# Supplementary material for: Drosophilaand genome-wide association studies: a review and resource for the functional dissection of human complex traits
Source: Oxford University Press journal article supplement (doi:10.1242/dmm.027680), 2017-02-01
Supplement: dmm027680supp.pdf [file dmm027680supp.pdf]

**Supplemental Table 1. Categorization of GWAS Traits based on Target Tissue or Disease Mechanism.**

**Supplemental Table 2. Conservation of Human GWAS Candidate Genes in Drosophila.**

**Supplemental Table 3. Expression of Fly Homologs of Susceptibility Gene Candidates from GWAS in Drosophila Tissues.**

**Supplemental Table 4. Analysis of fly homologs of human susceptibility genes from GWAS for lethal loss-of-function phenotypes.**

[Click here to Download Tables S1 – S4](#)
